# Immune responses to *Helicobacter pylori* colonization: mechanisms and clinical outcomes

C. Portal-Celhay and G. I. Perez-Perez

Volume 110 (2006), pp. 305–314

All papers submitted to *Clinical Science* are received on the understanding that the material presented is the author(s)' original work and has not been published elsewhere.

All authors who submit work to *Clinical Science* are aware of this policy when submissions are made.

It has been brought to the attention of the Editorial Board that this Review Article by Cynthia Portal-Celhay and Guillermo I. Perez-Perez contains a significant amount of text that has been reproduced directly from a number of other publications and that very little original input has been made. The Editorial Board are therefore retracting this paper.

Published on the Internet 17 October 2014, doi: 10.1042/CS20050232ret
